# Supplementary material
Source: PubMed Central journal article supplement (PMC4793847)
Supplement: degn020871.wt1_default.pdf [file degn020871.wt1_default.pdf]

**Supplemental Table 1: sensitivity analyses**

|                                                                         |                                     | <b>70-75 years</b> |                      |             |         | <b>76-80 years</b> |                      |             |         | <b>Relative ratio</b>                       |             |
|-------------------------------------------------------------------------|-------------------------------------|--------------------|----------------------|-------------|---------|--------------------|----------------------|-------------|---------|---------------------------------------------|-------------|
|                                                                         |                                     | Incidence*         | IRR <sub>70-75</sub> | 95% C.I.    | p-value | Incidence*         | IRR <sub>76-80</sub> | 95% C.I.    | p-value | IRR <sub>70-75</sub> / IRR <sub>76-80</sub> | 95% CI      |
| <b>Shortened screening uptake period</b>                                |                                     |                    |                      |             |         |                    |                      |             |         |                                             |             |
| Period                                                                  |                                     |                    |                      |             |         |                    |                      |             |         |                                             |             |
| <b>Early stage</b>                                                      | Pre-screening (1995-1997)           | 248.7              | 1.0 (ref)            |             | <0.001  | 253.9              | 1.0 (ref)            |             | <0.001  | 1.0                                         |             |
|                                                                         | Screening uptake period (1998-2001) | 323.0              | 1.56                 | (1.49-1.64) | <0.001  | 258.5              | 1.02                 | (0.96-1.08) | 0.56    | 1.53                                        | (1.42-1.65) |
|                                                                         | Implemented screening (2002-2011)   | 367.9              | 1.46                 | (1.40-1.52) | <0.001  | 215.6              | 0.85                 | (0.80-0.90) | <0.001  | 1.72                                        | (1.60-1.85) |
| Period                                                                  |                                     |                    |                      |             |         |                    |                      |             |         |                                             |             |
| <b>Advanced stage</b>                                                   | Pre-screening (1995-1997)           | 58.6               | 1.0 (ref)            |             | <0.001  | 66.0               | 1.0 (ref)            |             | 0.85    | 1.0                                         |             |
|                                                                         | Screening uptake period (1998-2001) | 48.6               | 0.83                 | (0.75-0.92) | 0.001   | 68.3               | 1.03                 | (0.92-1.16) | 0.57    | 0.81                                        | (0.69-0.94) |
|                                                                         | Implemented screening (2002-2011)   | 50.4               | 0.86                 | (0.79-0.94) | 0.001   | 67.6               | 1.02                 | (0.92-1.14) | 0.65    | 0.84                                        | (0.74-0.96) |
| <b>Lengthened screening uptake period</b>                               |                                     |                    |                      |             |         |                    |                      |             |         |                                             |             |
| Period                                                                  |                                     |                    |                      |             |         |                    |                      |             |         |                                             |             |
| <b>Early stage</b>                                                      | Pre-screening (1995-1997)           | 248.7              | 1.0 (ref)            |             | <0.001  | 253.9              | 1.0 (ref)            |             | <0.001  | 1.0                                         |             |
|                                                                         | Screening uptake period (1998-2003) | 376.4              | 1.51                 | (1.45-1.58) | <0.001  | 248.3              | 0.98                 | (0.92-1.03) | 0.44    | 1.54                                        | (1.43-1.66) |
|                                                                         | Implemented screening (2004-2011)   | 365.3              | 1.47                 | (1.41-1.53) | <0.001  | 212.4              | 0.84                 | (0.79-0.88) | <0.001  | 1.75                                        | (1.62-1.88) |
| Period                                                                  |                                     |                    |                      |             |         |                    |                      |             |         |                                             |             |
| <b>Advanced stage</b>                                                   | Pre-screening (1995-1997)           | 58.6               | 1.0 (ref)            |             | <0.001  | 66.0               | 1.0 (ref)            |             | 0.85    | 1.0                                         |             |
|                                                                         | Screening uptake period (1998-2003) | 47.4               | 0.81                 | (0.73-0.89) | <0.001  | 69.7               | 1.06                 | (0.95-1.18) | 0.33    | 0.76                                        | (0.66-0.89) |
|                                                                         | Implemented screening (2004-2011)   | 51.7               | 0.88                 | (0.81-0.97) | 0.007   | 66.4               | 1.01                 | (0.90-1.12) | 0.92    | 0.87                                        | (0.76-1.00) |
| <b>Early stage defined as stage 0-1, stage 2 breast cancer excluded</b> |                                     |                    |                      |             |         |                    |                      |             |         |                                             |             |
| Period                                                                  |                                     |                    |                      |             |         |                    |                      |             |         |                                             |             |
| <b>Early stage</b>                                                      | Pre-screening (1995-1997)           | 191.5              | 1.0 (ref)            |             | <0.001  | 102.7              | 1.0 (ref)            |             | 0.26    | 1.0                                         |             |
|                                                                         | Screening uptake period (1998-2002) | 195.3              | 2.15                 | (2.02-2.30) | <0.001  | 98.7               | 0.96                 | (0.88-1.05) | 0.40    | 2.24                                        | (2.01-2.59) |
|                                                                         | Implemented screening (2003-2011)   | 248.8              | 2.39                 | (2.25-2.54) | <0.001  | 95.8               | 0.93                 | (0.86-1.02) | 0.11    | 2.57                                        | (2.33-2.84) |
| Period                                                                  |                                     |                    |                      |             |         |                    |                      |             |         |                                             |             |
| <b>Advanced stage</b>                                                   | Pre-screening (1995-1997)           | 58.6               | 1.0 (ref)            |             | <0.001  | 66.0               | 1.0 (ref)            |             | 0.73    | 1.0                                         |             |
|                                                                         | Screening uptake period (1998-2002) | 46.3               | 0.79                 | (0.71-0.87) | <0.001  | 68.9               | 1.04                 | (0.94-1.17) | 0.46    | 0.76                                        | (0.66-0.88) |
|                                                                         | Implemented screening (2003-2011)   | 51.8               | 0.88                 | (0.81-0.97) | 0.007   | 67.2               | 1.02                 | (0.92-1.13) | 0.74    | 0.86                                        | (0.76-0.99) |
| <b>IRR per year (continuous, starting from 1998)</b>                    |                                     |                    |                      |             |         |                    |                      |             |         |                                             |             |
| <b>Early stage</b>                                                      | Year of diagnosis                   |                    | 1.00                 | (1.00-1.00) | 0.88    |                    | 1.00                 | (1.00-1.00) | 0.88    | 1.00                                        | (1.00-1.00) |

|                       |                   |      |            |      |      |             |      |      |             |
|-----------------------|-------------------|------|------------|------|------|-------------|------|------|-------------|
| <b>Advanced stage</b> | Year of diagnosis | 1.00 | (1.0-1.01) | 0.37 | 0.99 | (0.98-1.00) | 0.17 | 1.01 | (1.00-1.02) |
|-----------------------|-------------------|------|------------|------|------|-------------|------|------|-------------|

---

<sup>a</sup>Cases per 100,000 women per year <sup>b</sup>CI=confidence interval
